# Supplementary material for: Efficient automatic construction of atom-economical QM regions with point-charge variation analysis
Source: Royal Society of Chemistry journal article supplement (doi:10.1039/d3cp01263h), 2023-01-01
Supplement: d3cp01263h1.pdf [file d3cp01263h1.pdf]

# Efficient automatic construction of atom-economical QM regions with point-charge variation analysis

Felix Brandt, Christoph R. Jacob<sup>1</sup>

Technische Universität Braunschweig, Institute of Physical and Theoretical Chemistry,  
Gaußstraße 17, 38106 Braunschweig, Germany

## Supporting Information

Date: May 3, 2023

---

<sup>1</sup>E-Mail: c.jacob@tu-braunschweig.de

## List of Figures

|     |                                                                        |    |
|-----|------------------------------------------------------------------------|----|
| S1  | saaPCVA scheme . . . . .                                               | 4  |
| S2  | COMT: Sensitivities and indicators for <i>standard</i> PCVA . . . . .  | 5  |
| S3  | COMT: Sensitivities and indicators for <i>no lig</i> PCVA . . . . .    | 6  |
| S4  | COMT: Sensitivities and indicators for <i>active</i> PCVA . . . . .    | 7  |
| S5  | COMT: Sensitivities and indicators for <i>vac fix</i> PCVA . . . . .   | 8  |
| S6  | COMT: Sensitivities and indicators for <i>vac</i> PCVA . . . . .       | 9  |
| S7  | COMT: Sensitivities and indicators for <i>cryst fix</i> PCVA . . . . . | 10 |
| S8  | COMT: Sensitivities and indicators for <i>cryst</i> PCVA . . . . .     | 11 |
| S9  | TIM: Sensitivities and indicators for <i>standard</i> PCVA . . . . .   | 16 |
| S10 | TIM: Sensitivities and indicators for <i>cryst</i> PCVA . . . . .      | 17 |

## List of Tables

|    |                                                                   |    |
|----|-------------------------------------------------------------------|----|
| S1 | PCVA-constructed QM regions of increasing size for COMT . . . . . | 12 |
| S2 | 16-residue QM regions for COMT . . . . .                          | 13 |
| S3 | Comparison of residue ranks for COMT . . . . .                    | 14 |
| S4 | QM regions (distance-based) for TIM . . . . .                     | 18 |
| S5 | PCVA-constructed QM regions of increasing size for TIM . . . . .  | 19 |
| S6 | Comparison of residue ranks for TIM . . . . .                     | 20 |

|    |                              |    |
|----|------------------------------|----|
| S7 | QM regions for DNA . . . . . | 22 |
|----|------------------------------|----|

# S1 QM region construction with PCVA

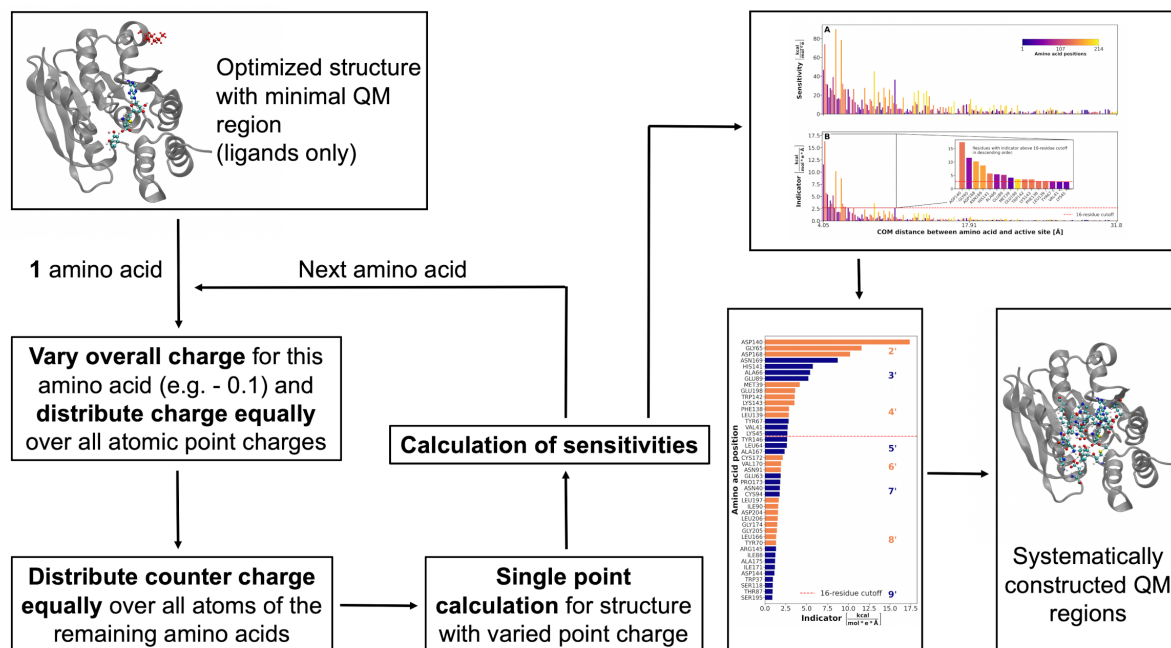

Figure S1: Schematic representation of the workflow for systematic QM region construction based on a single amino acid point charge variation analysis. Reproduced from *J. Chem. Theory Comput.* **18**, 2584-2596 (2022), DOI: 10.1021/acs.jctc.1c01093.

## S2 Simplified PCVA schemes for COMT

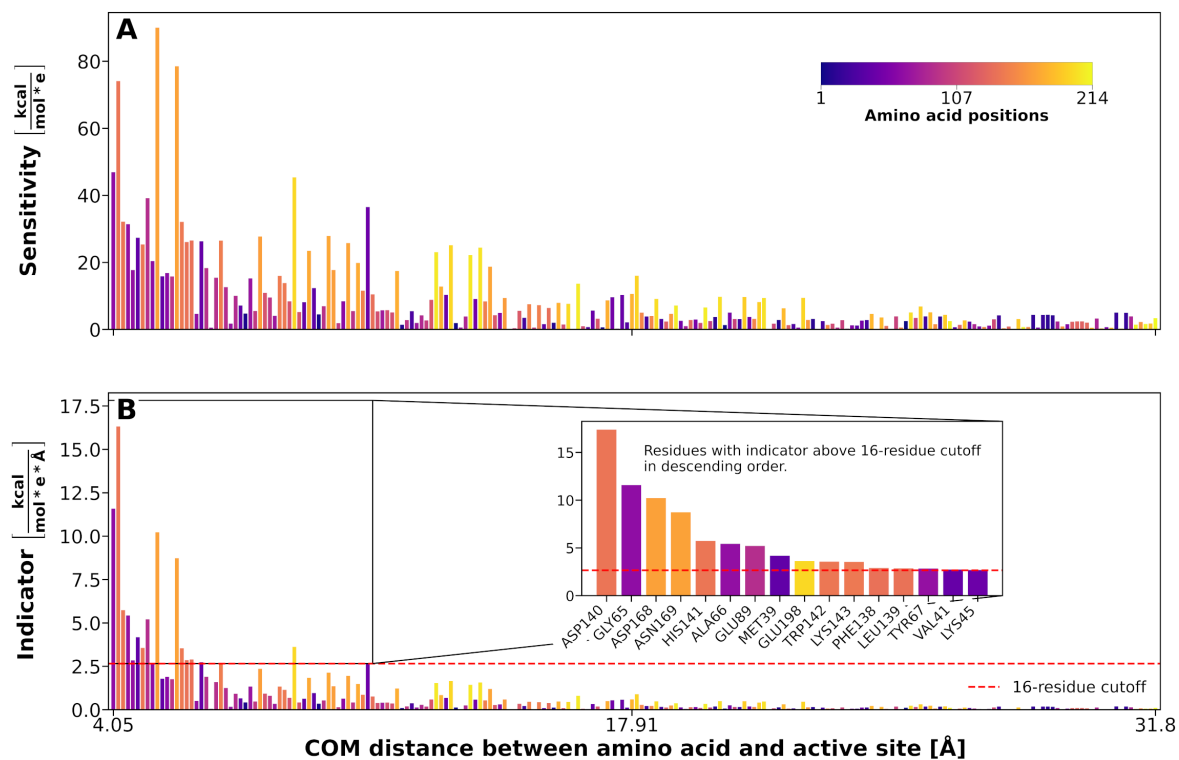

Figure S2: *standard* PCVA for COMT reactant energy. A: QM reactant energy sensitivities of all COMT amino acids sorted by ascending residue-active site distance. B: Corresponding QM region indicators for all amino acids. The 16 residues with the highest indicators are represented in the additional plot sorted by descending indicators.

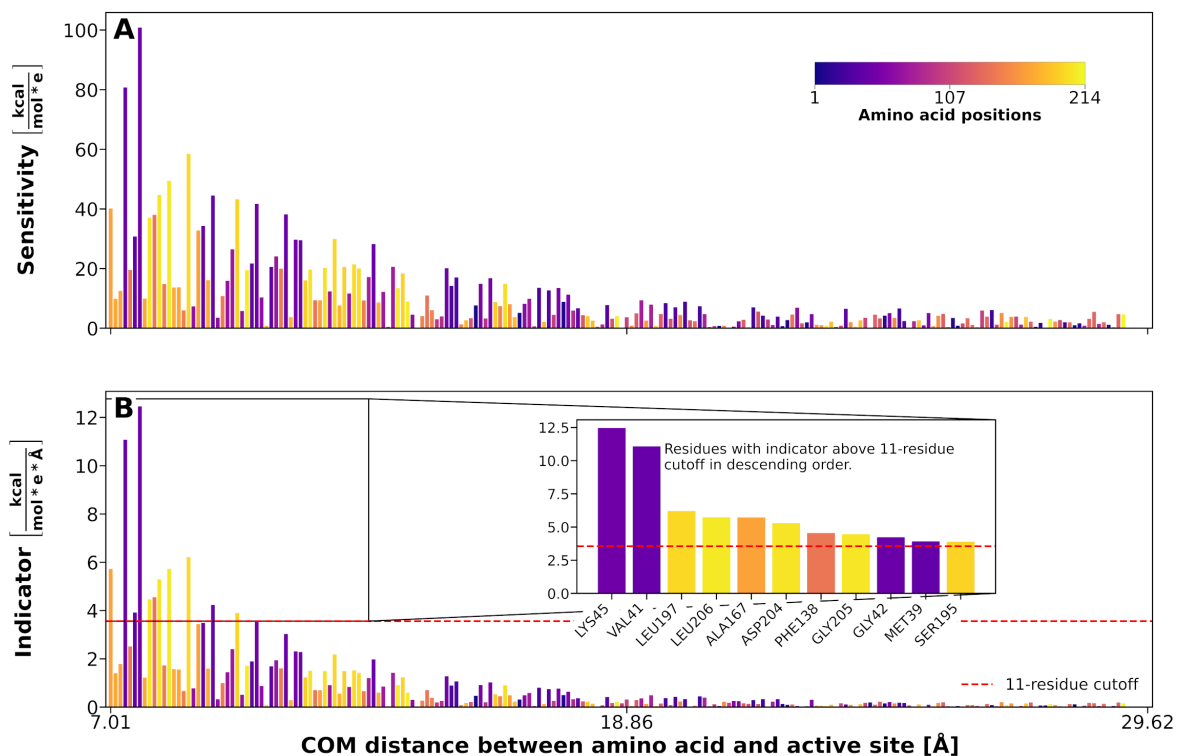

Figure S3: *no lig* PCVA for COMT reactant energy. A: QM reactant energy sensitivities of all COMT amino acids sorted by ascending residue-active site distance. B: Corresponding QM region indicators for all amino acids. The 11 residues with the highest indicators are represented in the additional plot sorted by descending indicators.

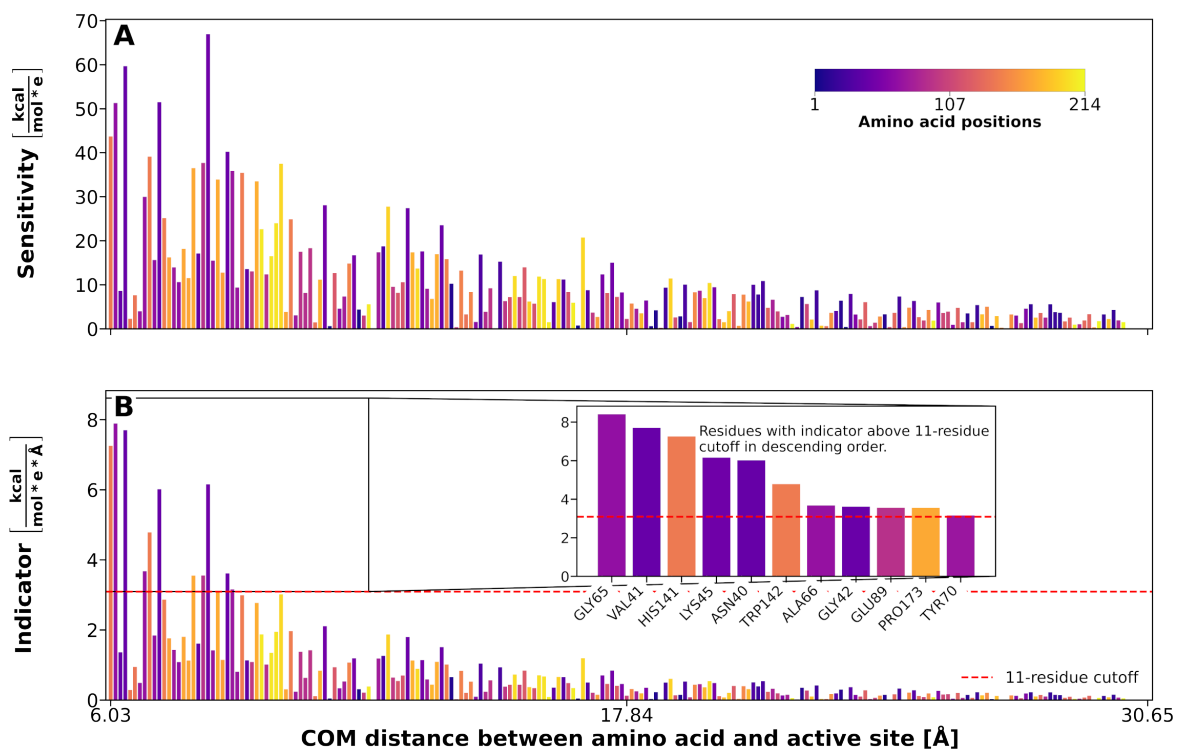

Figure S4: *active* PCVA for COMT reactant energy. A: QM reactant energy sensitivities of all COMT amino acids sorted by ascending residue-active site distance. B: Corresponding QM region indicators for all amino acids. The 11 residues with the highest indicators are represented in the additional plot sorted by descending indicators.

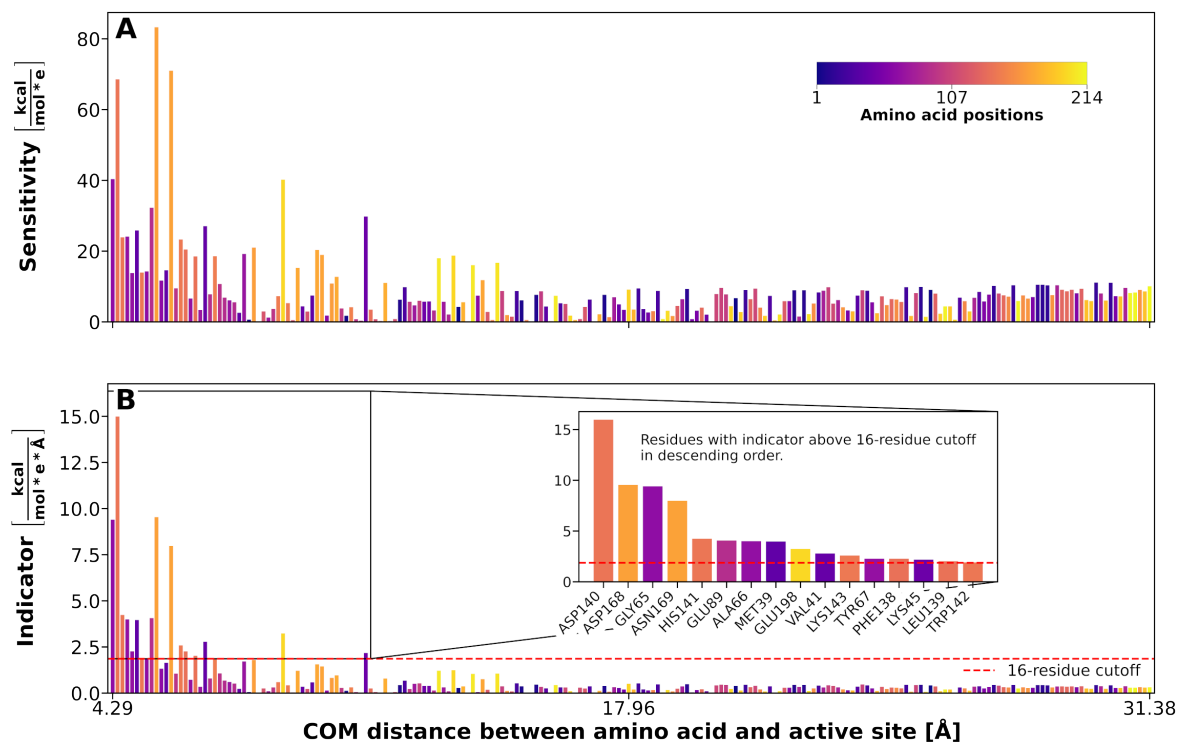

Figure S5: *vac fix* PCVA for COMT reactant energy. A: QM reactant energy sensitivities of all COMT amino acids sorted by ascending residue-active site distance. B: Corresponding QM region indicators for all amino acids. The 16 residues with the highest indicators are represented in the additional plot sorted by descending indicators.



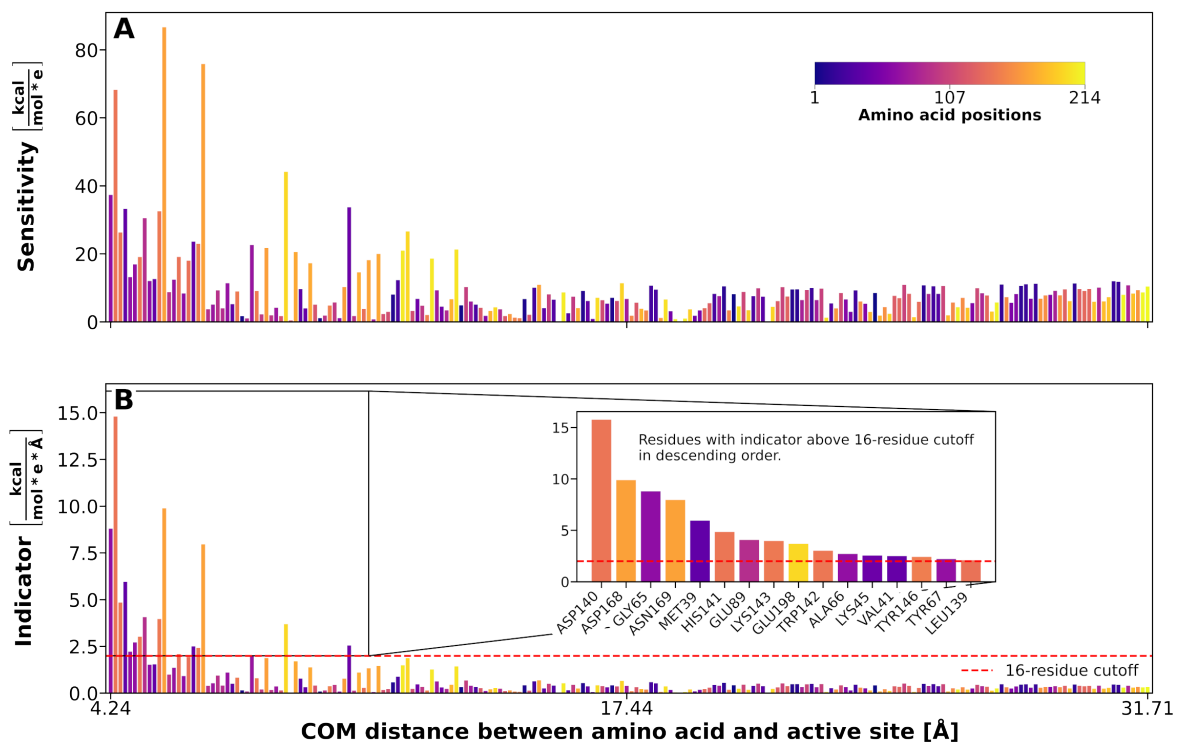

Figure S6: *vac* PCVA for COMT reactant energy. A: QM reactant energy sensitivities of all COMT amino acids sorted by ascending residue-active site distance. B: Corresponding QM region indicators for all amino acids. The 16 residues with the highest indicators are represented in the additional plot sorted by descending indicators.

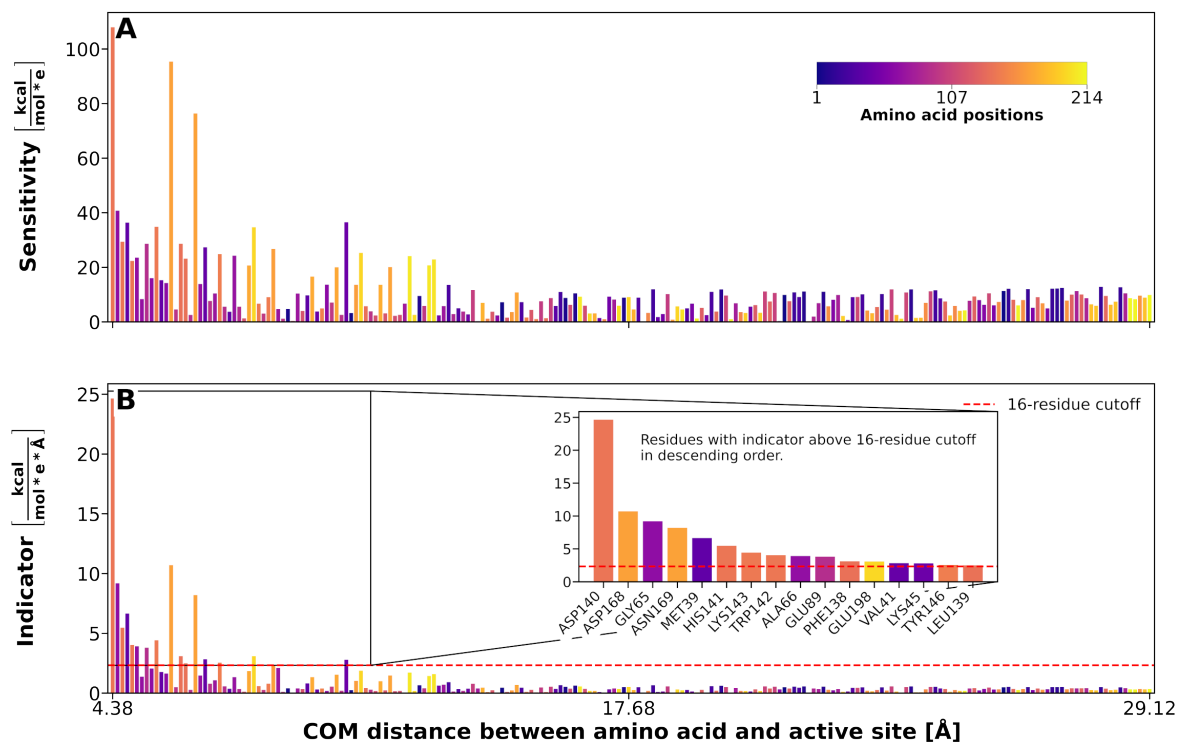

Figure S7: *cryst fix* PCVA for COMT reactant energy. A: QM reactant energy sensitivities of all COMT amino acids sorted by ascending residue-active site distance. B: Corresponding QM region indicators for all amino acids. The 16 residues with the highest indicators are represented in the additional plot sorted by descending indicators.

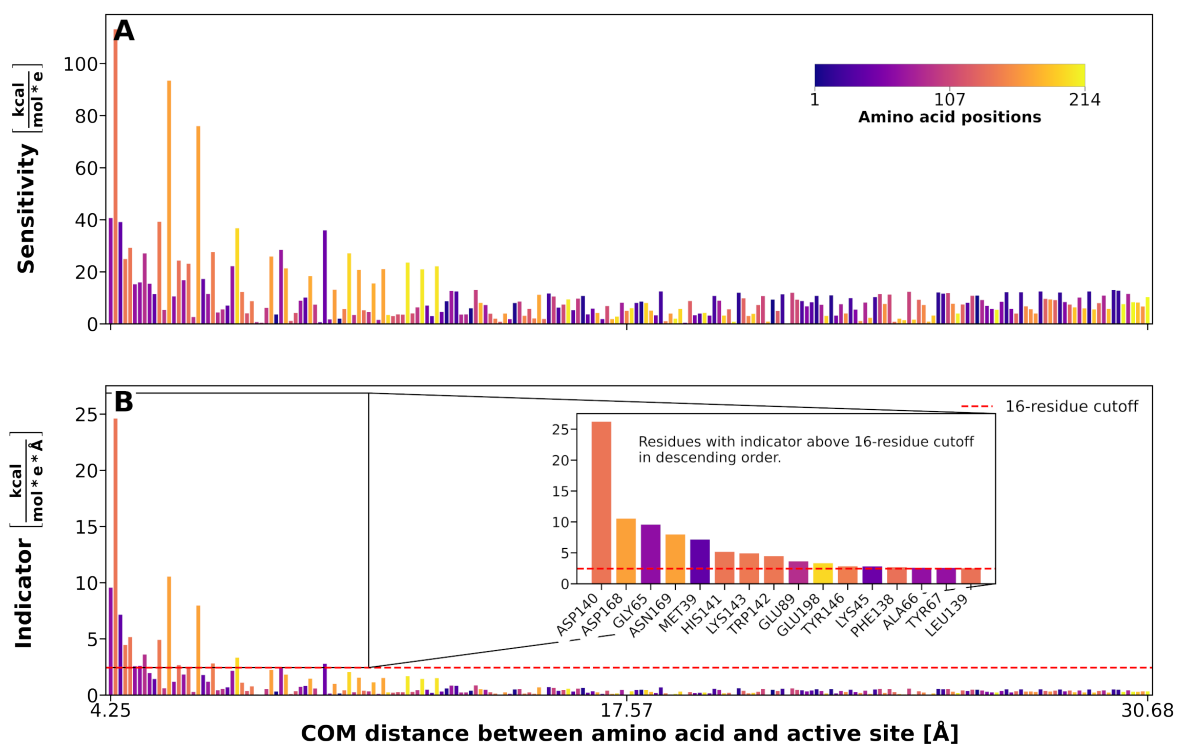

Figure S8: *cryst* PCVA for COMT reactant energy: QM reactant energy sensitivities of all COMT amino acids sorted by ascending residue-active site distance. B: Corresponding QM region indicators for all amino acids. The 16 residues with the highest indicators are represented in the additional plot sorted by descending indicators.

Table S1: Information on the QM regions of increasing size for COMT constructed by PCVA with a variation of  $-0.5$ . Residues are ordered according to their position in the indicator ranking. Reproduced from *J. Chem. Theory Comput.* **18**, 2584-2596 (2022), DOI: 10.1021/acs.jctc.1c01093.

| Region | Charge | Residues | Link atoms | Included residues                                                                                                                                                                                             |
|--------|--------|----------|------------|---------------------------------------------------------------------------------------------------------------------------------------------------------------------------------------------------------------|
| 1      | +1     | 0        | 0          | MG SAM CAT                                                                                                                                                                                                    |
| 2'     | 0      | 3        | 6          | D140 G65 D168 *                                                                                                                                                                                               |
| 3'     | -1     | 7        | 8          | D140 G65 D168 N169 H141 A66 E89 *                                                                                                                                                                             |
| 4'     | -1     | 13       | 12         | D140 G65 D168 N169 H141 A66 E89 M39 E198 W142 K143 F138 L139 *                                                                                                                                                |
| 5'     | 0      | 19       | 18         | D140 G65 D168 N169 H141 A66 E89 M39 E198 W142 K143 F138 L139 Y67 V41 K45 Y146 L64<br>A167 *                                                                                                                   |
| 6'     | 0      | 22       | 22         | D140 G65 D168 N169 H141 A66 E89 M39 E198 W142 K143 F138 L139 Y67 V41 K45 Y146 L64<br>A167 C172 V170 N91 *                                                                                                     |
| 7'     | -1     | 26       | 22         | D140 G65 D168 N169 H141 A66 E89 M39 E198 W142 K143 F138 L139 Y67 V41 K45 Y146 L64<br>A167 C172 V170 N91 E63 P173 N40 C94 *                                                                                    |
| 8'     | -2     | 34       | 24         | D140 G65 D168 N169 H141 A66 E89 M39 E198 W142 K143 F138 L139 Y67 V41 K45 Y146 L64<br>A167 C172 V170 N91 E63 P173 N40 C94 L197 I90 D204 L206 G174 G205 L166 Y70 *                                              |
| 9'     | -2     | 43       | 26         | D140 G65 D168 N169 H141 A66 E89 M39 E198 W142 K143 F138 L139 Y67 V41 K45 Y146 L64<br>A167 C172 V170 N91 E63 P173 N40 C94 L197 I90 D204 L206 G174 G205 L166 Y70 R145 I88<br>A175 I171 D144 W37 S118 T87 S195 * |

\* + MG SAM CAT H<sub>2</sub>O

Table S2: Information on the 16-residue QM regions constructed based on different PCVA schemes. Residues are ordered according to their position in the indicator ranking.

| Region           | Charge | Residues | Link atoms | Included residues                                                             |
|------------------|--------|----------|------------|-------------------------------------------------------------------------------|
| <i>standard</i>  | 0      | 16       | 16         | D140 G65 D168 N169 H141 A66 E89 M39 E198 W142 K143 F138 L139 Y67 V41 K45 *    |
| <i>active</i>    | 0      | 16       | 18         | D140 K143 D168 N169 E198 G65 V41 H141 K45 N40 W142 A66 G42 E89 Y70 G174 *     |
| <i>no lig</i>    | 0      | 16       | 20         | D140 K143 D168 N169 E198 K45 V41 L197 L206 A167 D204 F138 G205 G42 M39 S195 * |
| <i>vac</i>       | 0      | 16       | 18         | D140 D168 G65 N169 M39 H141 E89 K143 E198 W142 A66 K45 V41 Y146 Y67 L139 *    |
| <i>vac fix</i>   | 0      | 16       | 16         | D140 D168 G65 N169 H141 E89 A66 M39 E198 V41 K143 Y67 F138 K45 L139 W142 *    |
| <i>cryst</i>     | 0      | 16       | 16         | D140 D168 G65 N169 M39 H141 K143 W142 E89 E198 Y146 K45 F138 A66 Y67 L139 *   |
| <i>cryst fix</i> | 0      | 18       | 22         | D140 D168 G65 N169 M39 H141 K143 W142 A66 E89 F138 E198 V41 K45 Y146 L139 *   |

\* + MG SAM CAT H<sub>2</sub>O

Table S3: Comparison of residues included in a 16-residue QM region for different simplified PCVA schemes. Numbers indicate the rank of the amino acid according to the value assigned by the corresponding indicator. The highest-ranked 16 residues are marked in red. Active site residues already included in the minimal QM region for PCVA are indicated by an 0.

| Residue | standard | nolig | active | vac fix | vac | cryst fix | cryst |
|---------|----------|-------|--------|---------|-----|-----------|-------|
| ILE8    | 155      | 72    | 65     | 62      | 47  | 44        | 52    |
| MET39   | 8        | 10    | 32     | 8       | 5   | 5         | 5     |
| ASN40   | 25       | 13    | 5      | 21      | 22  | 22        | 31    |
| VAL41   | 15       | 2     | 2      | 10      | 13  | 13        | 24    |
| GLY42   | 53       | 9     | 8      | 99      | 129 | 140       | 206   |
| LYS45   | 16       | 1     | 4      | 14      | 12  | 14        | 12    |
| LEU62   | 52       | 94    | 106    | 174     | 201 | 177       | 189   |
| GLU63   | 23       | 53    | 45     | 24      | 35  | 24        | 33    |
| GLY65   | 2        | 57    | 1      | 3       | 3   | 3         | 3     |
| ALA66   | 6        | 71    | 7      | 7       | 11  | 9         | 14    |
| TYR67   | 14       | 36    | 81     | 12      | 15  | 30        | 15    |
| TYR70   | 34       | 22    | 11     | 20      | 17  | 18        | 17    |
| VAL73   | 138      | 68    | 70     | 48      | 45  | 41        | 38    |
| ARG74   | 186      | 37    | 37     | 113     | 93  | 105       | 85    |
| MET75   | 79       | 44    | 75     | 208     | 207 | 212       | 195   |
| GLU89   | 7        | 191   | 9      | 6       | 7   | 10        | 9     |
| MET101  | 113      | 91    | 90     | 44      | 42  | 40        | 37    |
| ILE122  | 87       | 137   | 84     | 187     | 194 | 197       | 207   |
| MET136  | 81       | 60    | 131    | 214     | 214 | 199       | 208   |
| VAL137  | 48       | 61    | 165    | 145     | 144 | 92        | 108   |
| PHE138  | 12       | 7     | 50     | 13      | 18  | 11        | 13    |
| LEU139  | 13       | 16    | 114    | 15      | 16  | 16        | 16    |
| ASP140  | 1        | 0     | 0      | 1       | 1   | 1         | 1     |
| HIS141  | 5        | 25    | 3      | 5       | 6   | 6         | 6     |
| TRP142  | 10       | 47    | 6      | 16      | 10  | 8         | 8     |
| LYS143  | 11       | 0     | 0      | 11      | 8   | 7         | 7     |
| TYR146  | 17       | 63    | 15     | 18      | 14  | 15        | 11    |

|        |     |     |     |     |     |     |     |
|--------|-----|-----|-----|-----|-----|-----|-----|
| THR150 | 71  | 164 | 77  | 202 | 202 | 194 | 190 |
| THR163 | 134 | 140 | 193 | 160 | 169 | 167 | 175 |
| LEU165 | 56  | 62  | 207 | 178 | 184 | 165 | 156 |
| LEU166 | 33  | 14  | 38  | 33  | 40  | 34  | 36  |
| ALA167 | 19  | 5   | 25  | 19  | 19  | 17  | 18  |
| ASP168 | 3   | 0   | 0   | 2   | 2   | 2   | 2   |
| ASN169 | 4   | 0   | 0   | 4   | 4   | 4   | 4   |
| VAL170 | 21  | 24  | 42  | 23  | 29  | 28  | 27  |
| PRO173 | 24  | 43  | 10  | 27  | 21  | 21  | 23  |
| PHE178 | 45  | 168 | 56  | 92  | 75  | 86  | 68  |
| SER195 | 43  | 11  | 21  | 47  | 43  | 67  | 92  |
| LEU197 | 27  | 3   | 13  | 25  | 20  | 20  | 20  |
| GLU198 | 9   | 0   | 0   | 9   | 9   | 12  | 10  |
| ASP204 | 29  | 6   | 19  | 29  | 26  | 25  | 28  |
| GLY205 | 32  | 8   | 33  | 31  | 30  | 29  | 30  |
| LEU206 | 30  | 4   | 20  | 26  | 24  | 23  | 25  |
| GLU207 | 47  | 26  | 96  | 64  | 51  | 57  | 57  |
| TYR211 | 192 | 182 | 174 | 144 | 152 | 152 | 164 |

### S3 PCVA for Triosephosphate Isomerase (TIM)

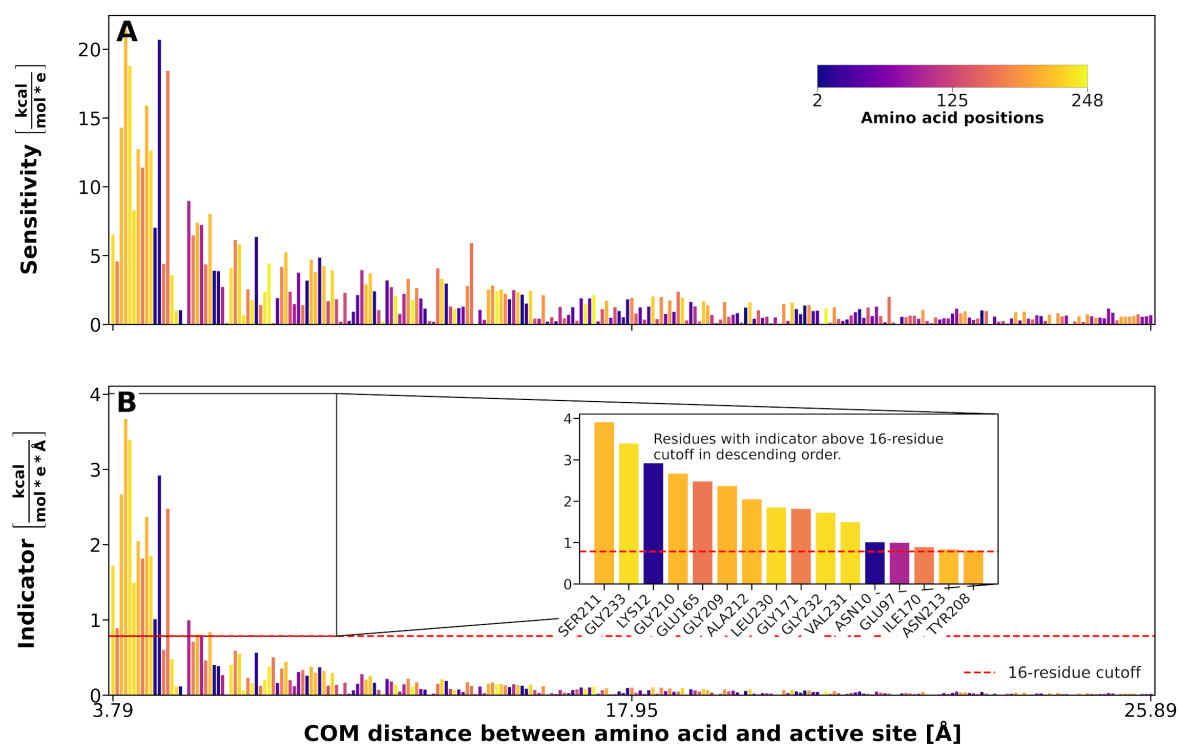

Figure S9: *standard* PCVA for TIM reactant energy. A: QM reactant energy sensitivities of all TIM amino acids sorted by ascending residue-active site distance. B: Corresponding QM region indicators for all amino acids. The 16 residues with the highest indicators are represented in the additional plot sorted by descending indicators.



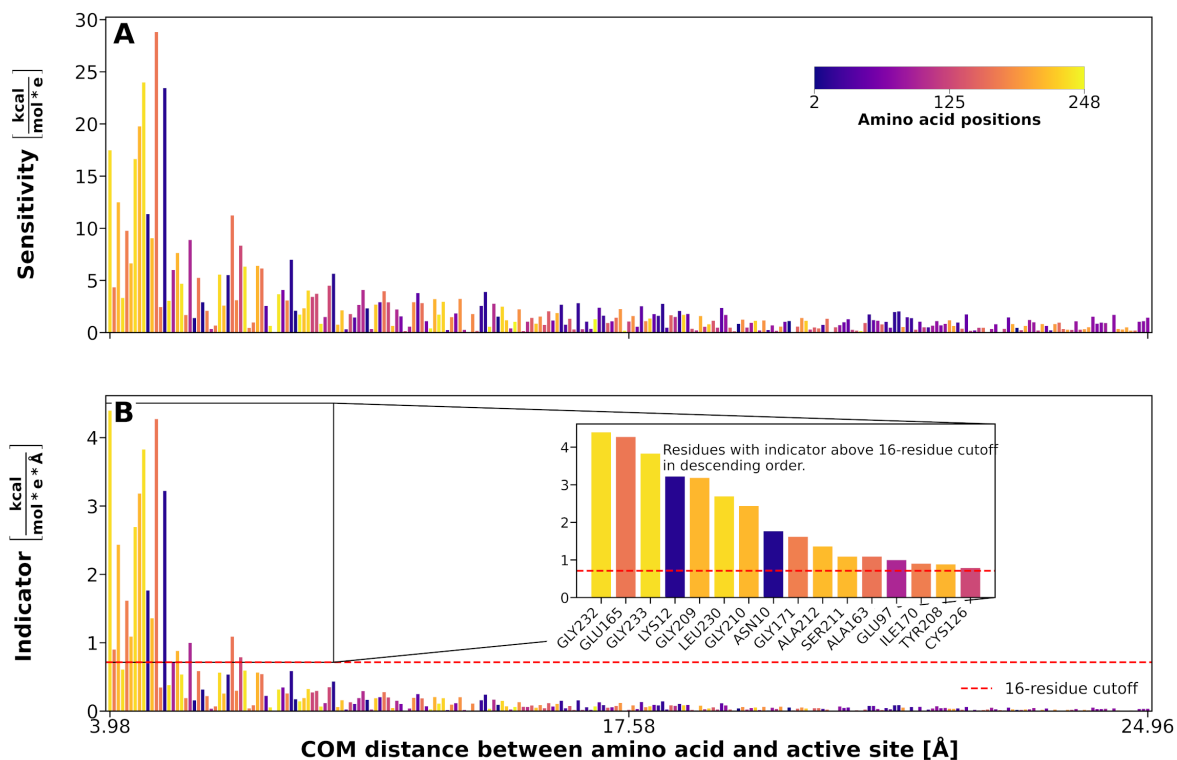

Figure S10: *cryst* PCVA for TIM reactant energy. A: QM reactant energy sensitivities of all TIM amino acids sorted by ascending residue-active site distance. B: Corresponding QM region indicators for all amino acids. The 16 residues with the highest indicators are represented in the additional plot sorted by descending indicators.

Table S4: Information on the TIM distance-based QM regions constructed by radially increasing the QM region size

| Region | Charge | Residues | Link atoms | Included residues                                                                                                                                                                                                   |
|--------|--------|----------|------------|---------------------------------------------------------------------------------------------------------------------------------------------------------------------------------------------------------------------|
| 1      | 0      | 0        | 0          | DHAP/PGH                                                                                                                                                                                                            |
| 2      | 0      | 2        | 4          | G232 I170 *                                                                                                                                                                                                         |
| 3      | 0      | 4        | 6          | G232 I170 G210 V231 *                                                                                                                                                                                               |
| 4      | -1     | 12       | 10         | G232 I170 G210 V231 L230 N10 G171 G209 G233 S211 E165 A212 *                                                                                                                                                        |
| 5      | 0      | 14       | 12         | G232 I170 G210 V231 L230 N10 G171 G209 G233 S211 E165 A212 K12 A169 *                                                                                                                                               |
| 6      | -1     | 20       | 16         | G232 I170 G210 V231 L230 N10 G171 G209 G233 S211 E165 A212 K12 A169 A234 H95 S235 E97<br>G9 Y208 *                                                                                                                  |
| 7      | -1     | 27       | 14         | G232 I170 G210 V231 L230 N10 G171 G209 G233 S211 E165 A212 K12 A169 A234 H95 S235 E97<br>G9 Y208 T172 P166 G8 S96 V167 G173 F229 *                                                                                  |
| 8      | -1     | 33       | 18         | G232 I170 G210 V231 L230 N10 G171 G209 G233 S211 E165 A212 K12 A169 A234 H95 S235 E97<br>G9 Y208 T172 P166 G8 S96 V167 G173 F229 F11 A163 N213 C126 L236 A175 *                                                     |
| 9      | 0      | 44       | 22         | G232 I170 G210 V231 L230 N10 G171 G209 G233 S211 E165 A212 K12 A169 A234 H95 S235 E97<br>G9 Y208 T172 P166 G8 S96 V167 G173 F229 F11 A163 N213 C126 L236 A175 C41 L207 I92 Y164<br>W168 L174 Q64 F240 K237 N14 V7 * |

\* + DHAP in reactants or PGH in products, respectively

Table S5: Information on the QM regions of increasing size for TIM constructed by PCVA including atom-economical QM regions for different PCVA schemes and CDA. Residues ordered according to position in indicator ranking. Only 12 residues could be extracted from Bash *et al.* 1991 for CDA,; they are ordered numerically.

| Region | Charge | Residues | Link atoms | Included residues                                                                                                                                                                                                      |
|--------|--------|----------|------------|------------------------------------------------------------------------------------------------------------------------------------------------------------------------------------------------------------------------|
| 1      | 0      | 0        | 0          | DHAP/PGH                                                                                                                                                                                                               |
| 2      | 0      | 2        | 4          | S211 G233 *                                                                                                                                                                                                            |
| 3      | 1      | 4        | 6          | S211 G233 K12 G210 *                                                                                                                                                                                                   |
| 4      | 0      | 12       | 12         | S211 G233 K12 G210 E165 G209 A212 L230 G171 G232 V231 N10 *                                                                                                                                                            |
| 5      | -1     | 14       | 14         | S211 G233 K12 G210 E165 G209 A212 L230 G171 G232 V231 N10 E97 I170 *                                                                                                                                                   |
| 6      | -1     | 20       | 20         | S211 G233 K12 G210 E165 G209 A212 L230 G171 G232 V231 N10 E97 I170 N213 Y208 H95 G173<br>A169 A175 *                                                                                                                   |
| 7      | -1     | 27       | 28         | S211 G233 K12 G210 E165 G209 A212 L230 G171 G232 V231 N10 E97 I170 N213 Y208 H95 G173<br>A169 A175 N14 F229 A163 A234 P166 C216 L236 *                                                                                 |
| 8      | -1     | 33       | 28         | S211 G233 K12 G210 E165 G209 A212 L230 G171 G232 V231 N10 E97 I170 N213 Y208 H95 G173<br>A169 A175 N14 F229 A163 A234 P166 C216 L236 G8 F11 I243 L207 L13 A176 *                                                       |
| 9      | -1     | 44       | 30         | S211 G233 K12 G210 E165 G209 A212 L230 G171 G232 V231 N10 E97 I170 N213 Y208 H95 G173<br>A169 A175 N14 F229 A163 A234 P166 C216 L236 G8 F11 I243 L207 L13 A176 Y164 A217 Q64<br>G214 G228 Y101 S96 V7 F220 L174 A181 * |
| PCVA   | -1     | 16       | 14         | S211 G233 K12 G210 E165 G209 A212 L230 G171 G232 V231 N10 E97 I170 N213 Y208 *                                                                                                                                         |
| cryst  | -1     | 16       | 20         | G232 E165 G233 K12 G209 L230 G210 N10 G171 A212 S211 A163 E97 I170 Y208 C126 *                                                                                                                                         |
| CDA    | 0      | 12       | 20         | N10 K12 E77 H95 E97 R98 R99 E104 K112 E129 E165 K237 *                                                                                                                                                                 |

\* + DHAP in reactants or PGH in products, respectively

Table S6: Comparison of residues included in a 16-residue (and 12-residue) QM region for standard PCVA, crystal structure PCVA and CDA. Numbers indicate the rank of the amino acid according to the value assigned by the corresponding inclusion scheme. The highest-ranked 16 residues are marked in red. For CDA, the 12 highest-ranked residues are indicated by an x.

| Residue | standard | cryst | CDA |
|---------|----------|-------|-----|
| ASN10   | 12       | 8     | x   |
| LYS12   | 3        | 4     | x   |
| HIS95   | 17       | 17    | x   |
| GLU97   | 13       | 13    | x   |
| ARG98   | 51       | 52    | x   |
| ARG99   | 127      | 184   | x   |
| GLU104  | 107      | 118   | x   |
| LYS112  | 148      | 177   | x   |
| CYS126  | 49       | 16    |     |
| GLU129  | 106      | 71    | x   |
| ALA163  | 23       | 12    |     |
| GLU165  | 5        | 2     | x   |
| ILE170  | 14       | 14    |     |
| GLY171  | 9        | 9     |     |
| TYR208  | 16       | 15    |     |
| GLY209  | 6        | 5     |     |
| GLY210  | 4        | 7     |     |
| SER211  | 1        | 11    |     |
| ALA212  | 7        | 10    |     |
| ASN213  | 15       | 41    |     |
| LEU230  | 8        | 6     |     |
| VAL231  | 11       | 18    |     |
| GLY232  | 10       | 1     |     |
| GLY233  | 2        | 3     |     |
| LYS237  | 117      | 33    | x   |

## S4 PCVA for DNA

Table S7: Information on the DNA QM regions constructed by distance and PCVA according to different schemes. Per region the two bases which are added to the QM region are indicated with their abbreviation and position in the system. The number of link atoms corresponds to the number of bases added and the charge of the QM region stays constant at 0.

| Scheme         | Bases added per QM region |         |         |          |         |          |          |          |         |         |
|----------------|---------------------------|---------|---------|----------|---------|----------|----------|----------|---------|---------|
|                | 1                         | 2       | 3       | 4        | 5       | 6        | 7        | 8        | 9       | 10      |
| distance       | G7, C14                   | A6, T15 | A8, T13 | T5, A16  | G9, C12 | C4, G17  | G10, C11 | T3, A18  | C2, G19 | C1, G20 |
| PCVA QM single | G7, C14                   | A6, A8  | C12, G9 | C11, A16 | T5, G10 | T15, G17 | T13, A18 | G19, T3  | G20, C2 | C1, C4  |
| PCVA QM pairs  | G7, C14                   | A6, T15 | G9, C12 | A8, T13  | T5, A16 | G10, C11 | T3, A18  | C4, G17  | C2, G19 | C1, G20 |
| PCVA RE single | G7, C14                   | T15, A6 | T13, T5 | G10, G9  | C12, A8 | A18, G17 | G19, C4  | G20, C11 | T3, A16 | C1, C2  |
| PCVA RE pairs  | G7, C14                   | A6, T15 | A8, T13 | G9, C12  | T5, A16 | G10, C11 | C4, G17  | T3, A18  | C2, G19 | C1, G20 |
